# Supplementary material
Source: PubMed Central journal article supplement (PMC3862281)
Supplement: supp_blood-2013-07-474825_blood-2013-07-474825-1.pdf [file supp_blood-2013-07-474825_blood-2013-07-474825-1.pdf]

**Supplementary Table S1. Comparative analysis of hemogenic endothelial populations identified by different groups**

| Phenotype                                                              |                                                                                     | Endothelial Potential                                                | Hematopoietic CFC potential                                                                                                         | Lymphoid Potential                                                                                                                                                   | Presence of bipotential cells/EHT* demonstration                                 | Separation of HE from non-HE | Time-frame for detection/Differentiation system                                                                                                                                                                                                             | Ref           |
|------------------------------------------------------------------------|-------------------------------------------------------------------------------------|----------------------------------------------------------------------|-------------------------------------------------------------------------------------------------------------------------------------|----------------------------------------------------------------------------------------------------------------------------------------------------------------------|----------------------------------------------------------------------------------|------------------------------|-------------------------------------------------------------------------------------------------------------------------------------------------------------------------------------------------------------------------------------------------------------|---------------|
| Endothelial Markers                                                    | Hematopoietic Markers                                                               |                                                                      |                                                                                                                                     |                                                                                                                                                                      |                                                                                  |                              |                                                                                                                                                                                                                                                             |               |
| VE-cad <sup>+</sup><br>CD31 <sup>+</sup><br>KDR <sup>+</sup>           | CD45 <sup>-</sup>                                                                   | Formed endothelial monolayer when cultured in endothelial conditions | Freshly isolated cells lacked CFC activity in serum-containing clonogenic medium, but acquired CFC potential after in vitro culture | Not tested                                                                                                                                                           | 0.18% cells were bipotential (produced both endothelial and hematopoietic cells) | Not separated                | 3 days before emergence of CD45 <sup>+</sup> cells in serum-containing EB** system                                                                                                                                                                          | <sup>99</sup> |
| CD31 <sup>+</sup><br>CD34 <sup>+</sup><br>> 90%<br>VE-cad <sup>+</sup> | CD43 <sup>-</sup><br>CD45 <sup>-</sup><br>CD41a <sup>-</sup><br>CD235a <sup>-</sup> | Not tested                                                           | Cells showed CFC potential after coculture with DLL4-OP9                                                                            | Cells showed T cell potential after coculture with DLL4-OP9. T cell potential was enhanced by inhibition of TGFβ signaling at early stages of mesodermal development | Not tested                                                                       | Not separated                | 1-3 days before emergence of CD45 <sup>+</sup> cells in serum-free EB system; the late HE cells (1 day before emergence of CD45 <sup>+</sup> cells) had higher T cell potential as compare to early HE (3 days before emergence of CD45 <sup>+</sup> cells) | <sup>66</sup> |

|                                                                                   |                                                                                       |                                                                                                                     |                                                                                                                                                  |            |                                                                                                                                                  |                                                                                                                                       |                                                                                                 |                |
|-----------------------------------------------------------------------------------|---------------------------------------------------------------------------------------|---------------------------------------------------------------------------------------------------------------------|--------------------------------------------------------------------------------------------------------------------------------------------------|------------|--------------------------------------------------------------------------------------------------------------------------------------------------|---------------------------------------------------------------------------------------------------------------------------------------|-------------------------------------------------------------------------------------------------|----------------|
| VE-cad-promoter (VPr)-driven fluorescent reporter positive cells                  | CD41Pr <sup>-</sup><br>CD43 <sup>-</sup>                                              | VPr <sup>+</sup> CD41Pr <sup>-</sup> cells displayed primary endothelial characteristics before transition to blood | CD43 <sup>+</sup> cells derived from VPr <sup>+</sup> cells generated all types of CFCs                                                          | Not tested | Real time imaging demonstrated that VPr <sup>+</sup> cells undergo EHT after two divisions                                                       | Hemogenic activity within CD43 <sup>-</sup> CD31 <sup>+</sup> VPr <sup>+</sup> subset mostly segregated to CD73 <sup>-</sup> fraction | 1-2 days before emergence of CD41Pr <sup>+</sup> cells in hESC coculture with endothelial cells | <sup>102</sup> |
| VE-cad <sup>+</sup><br>CD31 <sup>+</sup><br>CD34 <sup>+</sup><br>KDR <sup>+</sup> | CD43 <sup>-</sup><br>CD235a <sup>-</sup><br>CD41a <sup>-</sup><br>CD45 <sup>-</sup>   | Formed endothelial monolayer when cultured in endothelial conditions                                                | Freshly isolated cells lacked CFC activity in serum-free and serum-containing clonogenic medium, but acquired CFC potential after culture on OP9 | Not tested | Real time imaging demonstrated direct EHT; Bipotential cells were detected at ~2% frequency                                                      | HE separated from non-HE based on lack of CD73 expression                                                                             | 1-3 days before emergence of CD45 <sup>+</sup> cells in hPSC/OP9 coculture                      | <sup>86</sup>  |
| VE-cad <sup>+</sup> ***<br>CD31 <sup>+</sup><br>KDR <sup>+</sup>                  | CD43 <sup>low</sup><br>CD235a <sup>+</sup><br>CD41a <sup>-</sup><br>CD45 <sup>-</sup> | Formed endothelial monolayer when cultured in endothelial conditions                                                | Freshly isolated cells showed FGF2 and hematopoietic cytokine-dependent CFC potential in serum-free clonogenic medium.                           | Not tested | Cells displayed primary hematopoietic characteristics and grew only few endothelial cells in culture on OP9; Bipotential cells were not detected | Not applicable                                                                                                                        | 1-2 days before emergence of CD45 <sup>+</sup> cells in hPSC/OP9 coculture                      | <sup>86</sup>  |

\*EHT is endothelial-hematopoietic transition; \*\*EB is embryoid body; \*\*\*This population was designated by authors as angiogenic hematopoietic progenitors (AHP).
